# Supplementary material for: Clinical Pharmacology of Elagolix: An Oral Gonadotropin-Releasing Hormone Receptor Antagonist for Endometriosis
Source: Springer Nature journal article supplement (doi:10.1007/s40262-019-00840-7), 2019-11-21

**Electronic Supplementary Material**

***Clinical Pharmacokinetics***

**Clinical Pharmacology of Elagolix: An Oral Gonadotropin-Releasing Hormone Receptor Antagonist for Endometriosis**

Mohamad Shebley, PhD1, Akshanth R. Polepally, PhD1, Ahmed Nader, PhD1, Juki W. Ng, PharmD, PhD2, Insa Winzenborg, PhD1, Cheri E. Klein, PhD1, Peter Noertersheuser, PhD1, Megan A. Gibbs, PhD1, Nael M. Mostafa, PhD1

1 Clinical Pharmacology and Pharmacometrics, AbbVie Inc., North Chicago, IL, USA

2 Pharmaceutical Development, General Medicine, AbbVie Inc., North Chicago, IL, USA

**Corresponding author:**

Mohamad Shebley, PhD

AbbVie Inc., 1 North Waukegan Road

North Chicago, IL, 60064

USA

Email: [mohamad.shebley@abbvie.com](mailto:mohamad.shebley@abbvie.com)

**Supplemental Figure 1.** Elagolix site of absorption profile represented by plasma exposures following administration to the stomach (oral administration), jejunum, ileum, and colon (InteliSite® delivery).


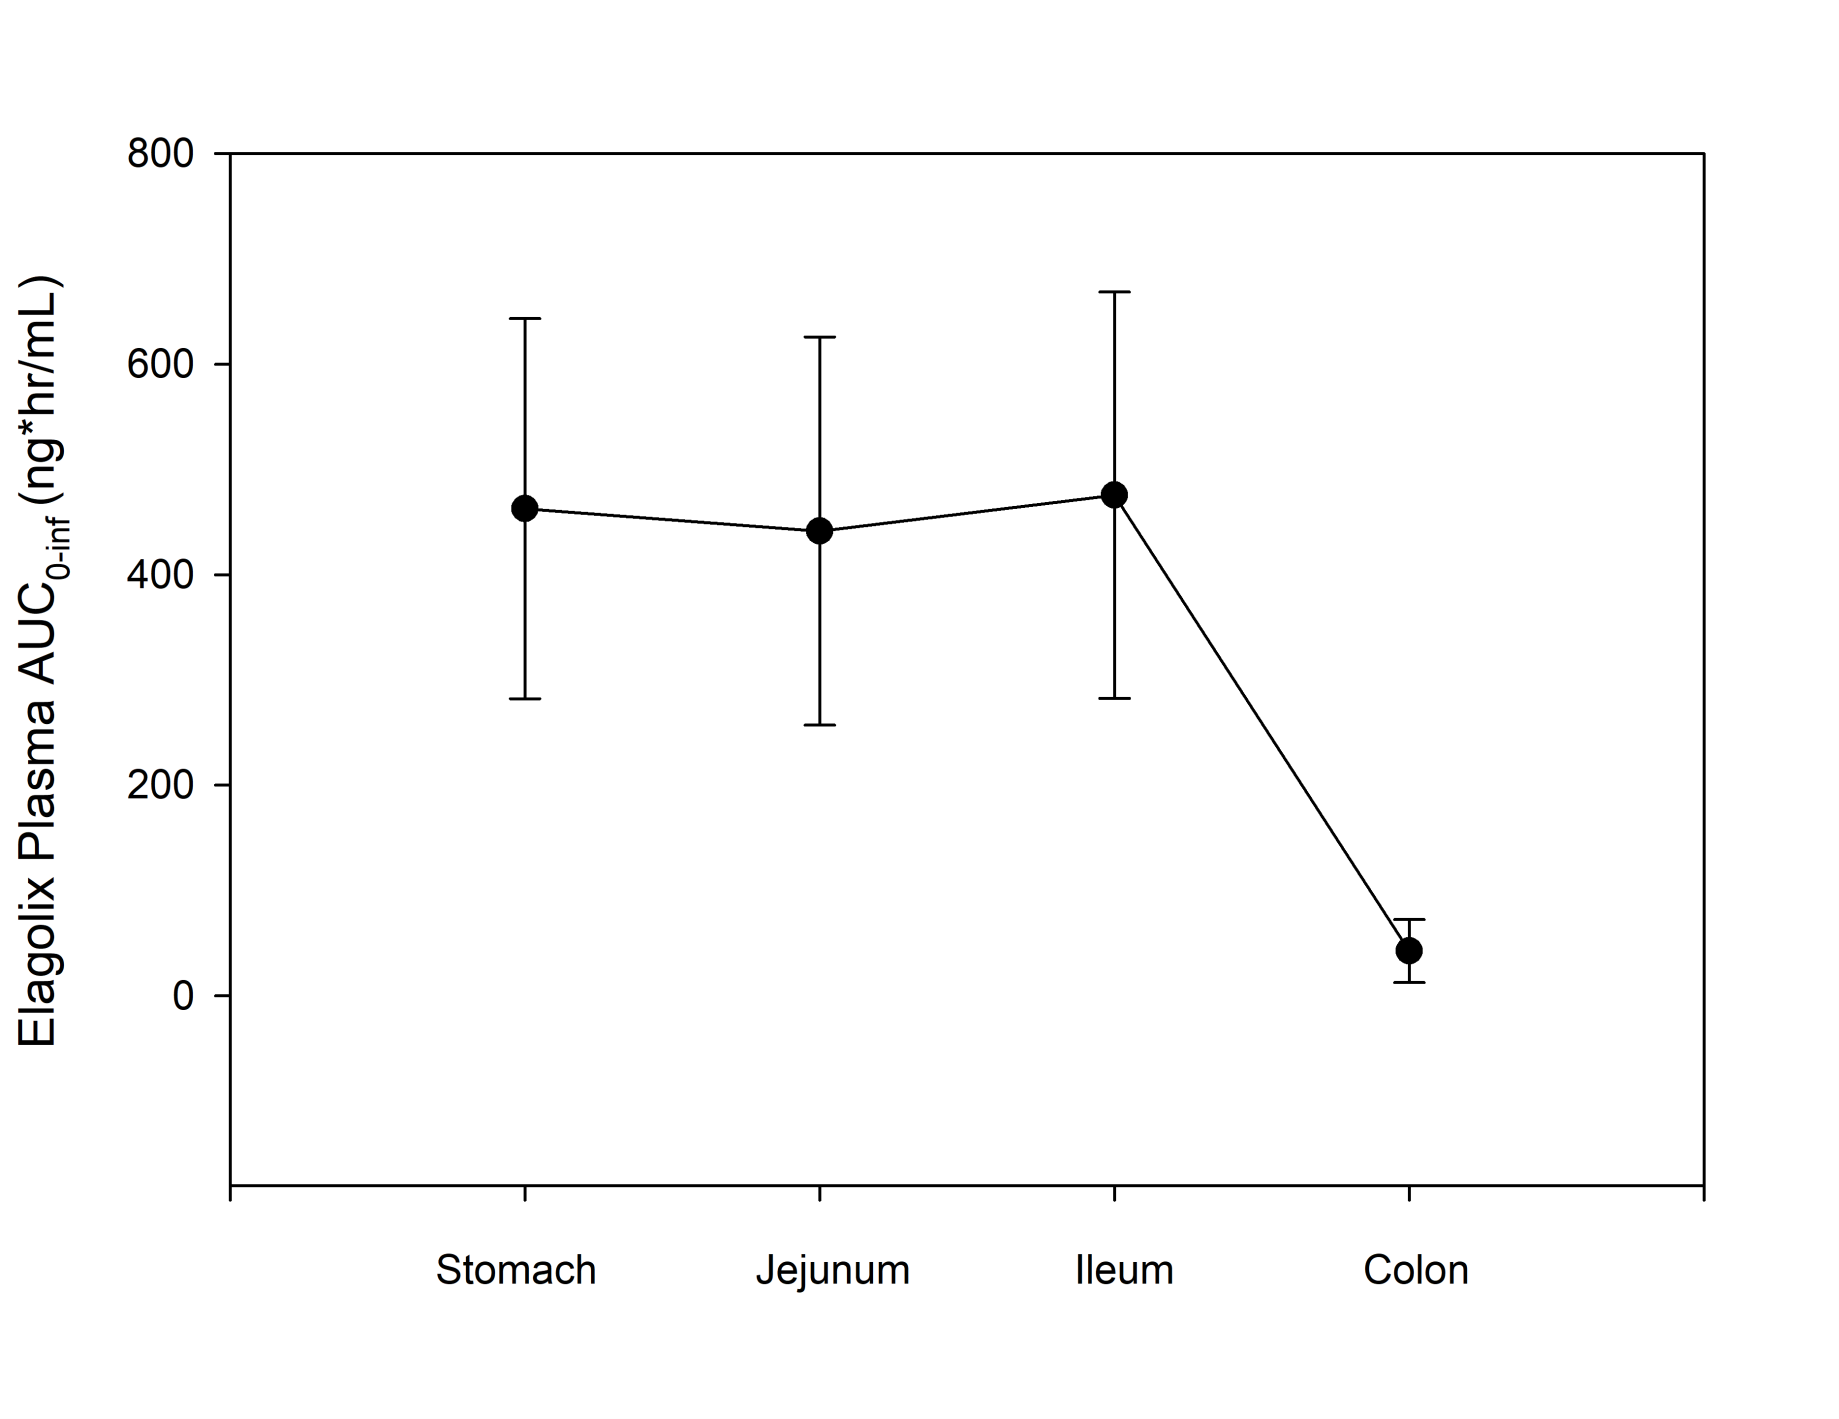

Supplement: MOESM1 [file 17415470]
